# Supplementary material for: Climate-Driven Adaptive Differentiation in Melia azedarach: Evidence from a Common Garden Experiment
Source: MDPI journal article supplement (doi:10.3390/genes13111924), 2022-10-22
Supplement: s1 [file s1]

Table S2. Information and source of the 135 primers

| Code number | NCBI Number | Primer F'                 | Primer R'                  | Source                                     | Reference         |
|-------------|-------------|---------------------------|----------------------------|--------------------------------------------|-------------------|
| 1           | HM041033    | GCATGAGCTTGAGAGAATC       | CAGAGGACTGAAGTAGCTGA       | <i>Swietenia macrophylla</i>               | (Lemes,2011)      |
| 2           | HM041034    | GATAGCGGAGCCGGTGATT       | GGATGGAAGGCTCAAGATTCG      | <i>Swietenia macrophylla</i>               | (Lemes,2011)      |
| 3           | HM041035    | TTCCTCTTCCTTGACCGCTC      | CGTACGGTTATGATCAGCGAC      | <i>Swietenia macrophylla</i>               | (Lemes,2011)      |
| 4           | HM041038    | AGAGTGTTTCGAGAGCCTCAA     | AGAGCCGAATTCACCGAT         | <i>Swietenia macrophylla</i>               | (Lemes,2011)      |
| 5           | HM041039    | CTGTCATGCATATCGTTGGA      | GGGCAGATAAAGAGGAACAAG      | <i>Swietenia macrophylla</i>               | (Lemes,2011)      |
| 6           | HM041046    | CACATCGTGAGGAATTTACC      | TGGGATTTGTGTTCACCTT        | <i>Swietenia macrophylla</i>               | (Lemes,2011)      |
| 7           | HM041040    | GCTCGGTGGTGTACAGTT        | CAGTATGACAGTATCAAGGGGA     | <i>Swietenia macrophylla</i>               | (Lemes,2011)      |
| 8           | HM041041    | CGTGTTGCTACCTATATGC       | TATACCGACCGCTTAAGT         | <i>Swietenia macrophylla</i>               | (Lemes,2011)      |
| 9           | HM041042    | CAGTCATGGAGCGTAGCTAA      | TGCAGTTTCAGAACCTGAATC      | <i>Swietenia macrophylla</i>               | (Lemes,2011)      |
| 10          | HM041043    | TAGGAACCAACCACCAAC        | GTTCTCCTGCTCTCTTTGA        | <i>Swietenia macrophylla</i>               | (Lemes,2011)      |
| 11          | HM041044    | TCAGGAATGGAAGGTACAGG      | CAGTCATGGAGCGTAGCTAA       | <i>Swietenia macrophylla</i>               | (Lemes,2011)      |
| 12          | HM041045    | GAAGTGGCAATGTGCTGACT      | TCGGCAATAGCAAGACATTC       | <i>Swietenia macrophylla</i>               | (Lemes,2011)      |
| 13          | ---         | ACACATATGAATAGATATGCAGAGA | CACATAAAGCAACAGATACGCCAGC  | <i>Carapa guianensis</i>                   | (Dayanandan,1999) |
| 14          | ---         | TGCATTTCTTCTCCTTGCTTCTGG  | TCTTGACGTTGGCTCTTGACATTC   | <i>Carapa guianensis</i>                   | (Dayanandan,1999) |
| 15          | ---         | ACATTCTCTCTCTTTTCTCTCAGC  | TAGTGAAAAAGACTAGACCTCACAGT | <i>Carapa guianensis</i>                   | (Dayanandan,1999) |
| 16          | ---         | AAGACTTCCCCCAGATTTGTTTTT  | TGTACCAGTTCAGTTGATGCTCA    | <i>Carapa guianensis</i>                   | (Dayanandan,1999) |
| 17          | ---         | GTGGCGTAACAGACCAAAAC      | CCAGAGATACTCCATTCCAG       | <i>Toona ciliata</i> var. <i>pubescens</i> | (Liu, 2006)       |
| 18          | ---         | CACTTAGCCTGTAGCACTAG      | CTTACCAAACCTCATCTCTC       | <i>Toona ciliata</i> var. <i>pubescens</i> | (Liu, 2006)       |
| 19          | ---         | AGTAATAGCCTGTAGAGCAG      | AGAGTGGGGTGGTCGATGAG       | <i>Toona ciliata</i> var. <i>pubescens</i> | (Liu, 2006)       |
| 20          | ---         | GAAACCAGCAGGCAGAGC        | GAAGAAGGGTGAGCGAGA         | <i>Toona ciliata</i> var. <i>pubescens</i> | (Liu, 2006)       |
| 21          | ---         | CCTGAGATTCGTCCAAGT        | ACCGCATTAGTACCAGTAG        | <i>Toona ciliata</i> var. <i>pubescens</i> | (Liu, 2006)       |
| 22          | ---         | GATTACGCCAGGCAAACG        | TTGAATATGGGAGAAGGT         | <i>Toona ciliata</i> var. <i>pubescens</i> | (Liu, 2006)       |

Table S2. to be continued

|    |          |                         |                        |                                            |                 |
|----|----------|-------------------------|------------------------|--------------------------------------------|-----------------|
| 23 | ---      | ATTAGCTTACCGCATTAG      | CAAGGCGGCACTTGTTTT     | <i>Toona ciliata</i> var. <i>pubescens</i> | (Liu, 2006)     |
| 24 | ---      | GGCGACTAATGAGTGAGA      | AGAACGCAGCGAACTACA     | <i>Toona ciliata</i> var. <i>pubescens</i> | (Liu, 2006)     |
| 25 | ---      | GTGTTAGCCGACGAAGAA      | CATCAATTACAGTTGGTGGTA  | <i>Toona ciliata</i> var. <i>pubescens</i> | (Liu, 2006)     |
| 26 | ---      | AAGCCAGTCAGCAACCTA      | GATTAAGTAATATTGGGTGGT  | <i>Toona ciliata</i> var. <i>pubescens</i> | (Liu, 2006)     |
| 27 | ---      | TGTCTCAGTTTATGCTGGCGT   | CTGCCCAATCAACAAGAG     | <i>Toona ciliata</i> var. <i>pubescens</i> | (Liu, 2006)     |
| 28 | ---      | AACGGCTCAAATTCTATA      | CATTACTACCAGTATCCA     | <i>Toona ciliata</i> var. <i>pubescens</i> | (Liu, 2006)     |
| 29 | ---      | ATGGATGAGTGTGCGATAGG    | TGTGATGTAGGAGTCTGAAC   | <i>Toona ciliata</i> var. <i>pubescens</i> | (Liu, 2006)     |
| 30 | ---      | TTAGTACCAGCAGCTTACC     | AAGCCTGTCCACTTTCTC     | <i>Toona ciliata</i> var. <i>pubescens</i> | (Liu, 2006)     |
| 31 | ---      | TCGACGATTATGATGACCATG   | TGCAGTCTCCCTACTCAA     | <i>Toona ciliata</i> var. <i>pubescens</i> | (Liu, 2006)     |
| 32 | ---      | GCTTAGCTTACCGCATTAGT    | ATTACGCCAGGACTTTTCAC   | <i>Toona ciliata</i> var. <i>pubescens</i> | (Liu, 2006)     |
| 33 | ---      | GGTGGACTTAGCAGGTAG      | AATCTCAGAGGAAAGGGAC    | <i>Toona ciliata</i> var. <i>pubescens</i> | (Liu, 2006)     |
| 34 | ---      | CATCGGGAGGTTTAGGTC      | GTGTTTCATGGGAGTAGGG    | <i>Toona ciliata</i> var. <i>pubescens</i> | (Liu, 2006)     |
| 35 | ---      | TCCCTTCCAAGCTTGTTCCTG   | TGGCCCTTTCTCGATGTC     | <i>Swietenia macrophylla</i>               | (Cespedes,2003) |
| 36 | AJ000405 | AGGGTCTTTGTTGATGAATACC  | ATCATCGCCGTTGATACATT   | <i>Swietenia macrophylla</i>               | (Cespedes,2003) |
| 37 | AJ000407 | GCGATGAATGTTGTACACCG    | AGCAGCCCGGTACTAGCATGT  | <i>Swietenia macrophylla</i>               | (Cespedes,2003) |
| 38 | AJ000410 | TGGAGTAAAGTCGAGGGCTG    | GGCTGGATATGGCACTTGTT   | <i>Swietenia macrophylla</i>               | (Cespedes,2003) |
| 39 | AJ000389 | CCTGAAAGCTTAATGGCCAC    | TCAGCCTTTGAGGGATGAAC   | <i>Swietenia macrophylla</i>               | (Cespedes,2003) |
| 40 | AF428115 | GCGCGATTGATTGACTTC      | GCGCTTAGCATTATTCTCC    | <i>Khaya senegalensis</i>                  | (Sexton,2010)   |
| 41 | HQ200180 | CAAAATATTTAACTAGCCATCCA | CTCAAGTCCAATTCAATTCAT  | <i>Khaya senegalensis</i>                  | (Sexton,2010)   |
| 42 | HQ200181 | ACCATGCAATGCTAACTTTAT   | CTTTTGTGTCCAAAAATTGAC  | <i>Khaya senegalensis</i>                  | (Sexton,2010)   |
| 43 | HQ200182 | CTTAAGACATTGACCAATCC    | GTCGGACAATTGTGTTTTAGT  | <i>Khaya senegalensis</i>                  | (Sexton,2010)   |
| 44 | HQ200183 | CACTCAGACGCAATAAATTA    | GCGATTTTATATCTGGTTTTTC | <i>Khaya senegalensis</i>                  | (Sexton,2010)   |
| 45 | HQ200184 | ATCCAAAACGCTTCTAAAGTC   | GGATGTTATGGTGAAAAATTG  | <i>Khaya senegalensis</i>                  | (Sexton,2010)   |
| 46 | HQ200185 | CAATATAAGGGACAATACTCTCA | CAACATAGATCCATCGTGAGT  | <i>Khaya senegalensis</i>                  | (Sexton,2010)   |
| 47 | HQ200186 | TGGGGTAGTTTTAAAGTTGTG   | AAGGTTGGAAGAGTAATTTGC  | <i>Khaya senegalensis</i>                  | (Sexton,2010)   |

Table S2. to be continued

|    |          |                         |                            |                                            |                          |
|----|----------|-------------------------|----------------------------|--------------------------------------------|--------------------------|
| 48 | HQ200187 | TATAAGTGAATAAACCGCGTA   | TATAGCCTATCTTGTCGCAAA      | <i>Khaya senegalensis</i>                  | (Sexton,2010)            |
| 49 | HQ200188 | AAACGTGCTGGCTAGTTATTA   | TGTAAGTCAACAGCAAGAAAA      | <i>Khaya senegalensis</i>                  | (Sexton,2010)            |
| 50 | HQ200189 | TTTCAACTCTTCAATCTTCATCT | GGCACTACCAATATTTTGTTT      | <i>Khaya senegalensis</i>                  | (Sexton,2010)            |
| 51 | HQ200190 | ACAACTCTTTTACGTCCACCT   | CATCATCTTCTTCTGTTACGG      | <i>Khaya senegalensis</i>                  | (Sexton,2010)            |
| 52 | GQ254820 | TCTACTGGTTATGGCTGTGC    | TGGTTGTCGTGTAGTGCAAA       | <i>Cabrlea canjerana</i>                   | (Pereira,2010)           |
| 53 | GQ254827 | CTCAGCAGCAACAAGAGTA     | CAATGGTCGGACATCTTCCC       | <i>Cabrlea canjerana</i>                   | (Pereira,2010)           |
| 54 | GQ254833 | GAGAAGAGAAGGCTGTGTGC    | GAAACCTGATTCGTCGTCGT       | <i>Cabrlea canjerana</i>                   | (Pereira,2010)           |
| 55 | GQ254834 | TGGTCCGAGGATCAAAACA     | TGGGGACGAAATGGAACCTG       | <i>Cabrlea canjerana</i>                   | (Pereira,2010)           |
| 56 | GQ254838 | GCCAAGATCCAGCTAATGCT    | GCTGTTTGCCCTCCCTAACT       | <i>Cabrlea canjerana</i>                   | (Pereira,2010)           |
| 57 | GQ254841 | GTGACAGAGCGAGATTCCAT    | CCCCTTCAGCTCCAAAATGT       | <i>Cabrlea canjerana</i>                   | (Pereira,2010)           |
| 58 | GQ254845 | CTTGCGATGGCAATCAAACC    | AGAAGGGCATACCAGGTTCT       | <i>Cabrlea canjerana</i>                   | (Pereira,2010)           |
| 59 | GQ254847 | CTCCTCGTTTGCCACTCATT    | AAACAGAGGGTTTTTCGGTGC      | <i>Cabrlea canjerana</i>                   | (Pereira,2010)           |
| 60 | AJ000404 | ATGAACCATGTTTCAATCTCA   | GGGAGCATACATGATATGTACA     | <i>Swietenia humilis</i>                   | (White and Powell,1997a) |
| 61 | ---      | TTCCTCATTTCACTGTCATTACC | ATTATTACTGCAACAATCTGCAGGCT | <i>Swietenia humilis</i>                   | (White and Powell,1997a) |
| 62 | AJ000406 | GCAATGTTGAGGAACCGC      | AGCTTGGATTCTCCCATGC        | <i>Swietenia humilis</i>                   | (White and Powell,1997a) |
| 63 | AJ000408 | TGTTCCATGAGTTTACACAGCT  | ATTGTTTTGCATTCAGGTTTTT     | <i>Swietenia humilis</i>                   | (White and Powell,1997a) |
| 64 | AJ000409 | AAACTTAAGGCAGCCACAGC    | ACAGTGGCTCTGCTGGTTTT       | <i>Swietenia humilis</i>                   | (White and Powell,1997a) |
| 65 | DQ778303 | TCAATGCAATTTAGGAGGAA    | TGCTTGTTGAACCCTGTG         | <i>Toona ciliata</i> var. <i>pubescens</i> | (Liu, 2007)              |
| 66 | DQ453903 | GACTCGTGACACTTAGCCTGTA  | CTGGCGTAATCATGGTCATAC      | <i>Toona ciliata</i> var. <i>pubescens</i> | (Liu, 2007)              |
| 67 | DQ453904 | TAGGAAAGGCAAGGTGGG      | GGGTGGTCGATGAGGGTT         | <i>Toona ciliata</i> var. <i>pubescens</i> | (Liu, 2007)              |

Table S2. to be continued

|    |          |                           |                           |                                            |                  |
|----|----------|---------------------------|---------------------------|--------------------------------------------|------------------|
| 68 | ---      | GCCTGAGATTCGTCCAAGT       | ACCGCATTAGTACCAGTAG       | <i>Toona ciliata</i> var. <i>pubescens</i> | (Liu, 2007)      |
| 69 | ---      | TCGACGATTATGACCATG        | TGCAGTCTCCCTACTCAA        | <i>Toona ciliata</i> var. <i>pubescens</i> | (Liu, 2007)      |
| 70 | FM161907 | TGGTAACCAATCTGTGTGTGC     | CGGTTCCCTGGTTTCTTTTGG     | <i>Azadirachta indica</i>                  | (Boontong,2009)  |
| 71 | FM161908 | GAAAGGAGGGTTTCAAATCA      | TCGGCCGAACACAATTTTA       | <i>Azadirachta indica</i>                  | (Boontong,2009)  |
| 72 | FM161909 | ACAAAATTTTCCCCTCGAG       | AGAGCTATGAATGGTGGACTCAC   | <i>Azadirachta indica</i>                  | (Boontong,2009)  |
| 73 | FM161911 | CCACAAACAAATGGGAAACC      | CCCTTATTACAAAAGAAGAGGGAAG | <i>Azadirachta indica</i>                  | (Boontong,2009)  |
| 74 | FM161912 | GTCCACGCAAACAGAGACAC      | TTGGCTTGGCTTTCTCTTTC      | <i>Azadirachta indica</i>                  | (Boontong,2009)  |
| 75 | FM161913 | ATTTGTGTGTGCGTGCTAGG      | CGAGGAAGTACGACRCCRGAA     | <i>Azadirachta indica</i>                  | (Boontong,2009)  |
| 76 | FM161914 | TCCCAGTTATTCAACGTAGGC     | TCTTAATCATGGATTGCTTCACA   | <i>Azadirachta indica</i>                  | (Boontong,2009)  |
| 77 | EF413962 | TTTGCTTTGAGAAACCTTGT      | AACCTTCGAATTGGTTAAGG      | <i>Cedrela odorata</i>                     | (Hernández,2008) |
| 78 | EF413963 | CAAAGACCAAGATTTGATGC      | ACTATGGGTGGCACAACACTAC    | <i>Cedrela odorata</i>                     | (Hernández,2008) |
| 79 | EF413964 | TCATTCTTGGATCCTGCTAT      | GTGGGAAAGATTGTGAAGAA      | <i>Cedrela odorata</i>                     | (Hernández,2008) |
| 80 | EF413965 | ACTCCATTAAGTCCATGAA       | ATTTTCATTCCCTTTTAGCC      | <i>Cedrela odorata</i>                     | (Hernández,2008) |
| 81 | EF413966 | GATCTCACCCACTTGAAAAA      | GCTCATATTTGAGAGGCATT      | <i>Cedrela odorata</i>                     | (Hernández,2008) |
| 82 | EF413967 | CAATCAAACCAAAAATGGAT      | GCAAATTAACCAGAAAAACG      | <i>Cedrela odorata</i>                     | (Hernández,2008) |
| 83 | EF413968 | GAGTGAGAAGAAGAATCGTGATAGC | GAGGTTTCGATCAGGTCTTGG     | <i>Cedrela odorata</i>                     | (Hernández,2008) |
| 84 | EF413969 | ATTTTCATTCCCTTTTAGCC      | TTATCATCTCCCTCACTCCA      | <i>Cedrela odorata</i>                     | (Hernández,2008) |
| 85 | EF413970 | CTCGTAATAATCCCATTCCA      | GGAGATATTTTGGGGTTTT       | <i>Cedrela odorata</i>                     | (Hernández,2008) |
| 86 | JF423305 | ACACTACCTCCACTGGGCTC      | AGATGGGACCGTGACCTG        | <i>African mahogany</i>                    | (KARAN,2012)     |
| 87 | JF423306 | ATGCAGCAACAAACAGCAG       | ATCAGGAAGCTCGGGTTGC       | <i>African mahogany</i>                    | (KARAN,2012)     |
| 88 | JF423307 | CAGCGAGCTATAATAAGACCAAAG  | ACCTGATGACTTCTCTCTCTCTC   | <i>African mahogany</i>                    | (KARAN,2012)     |
| 89 | JF423308 | CGGCTTAGAGGTCAAAATCGG     | TGCAACTTATGTACGTGAGAAAC   | <i>African mahogany</i>                    | (KARAN,2012)     |
| 90 | JF423309 | GCAACAATGCACACAGGTC       | ATAGACGCATACTCCGCCC       | <i>African mahogany</i>                    | (KARAN,2012)     |
| 91 | JF423310 | GCAATGTAATACTTAAAAGCAGGTG | ATTTGTGAGGCGAGTGAAAG      | <i>African mahogany</i>                    | (KARAN,2012)     |
| 92 | JF423311 | TGCAGACTTCTGTTGCTCC       | TGGCGGTAGATGTGTGGTC       | <i>African mahogany</i>                    | (KARAN,2012)     |

Table S2. to be continued

|     |          |                         |                          |                              |                             |
|-----|----------|-------------------------|--------------------------|------------------------------|-----------------------------|
| 93  | JF423312 | TGTTCACTGGTCGGATGTG     | GTTGGTGGCGATATGCTCG      | <i>African mahogany</i>      | (KARAN,2012)                |
| 94  | JF423313 | TTGAGGGAGGAGCAAGACG     | TCTGGCCAATACCAAGTATCAC   | <i>African mahogany</i>      | (KARAN,2012)                |
| 95  | JF423314 | TTGGCAGTTACAAGCACGC     | TGTGAGGTAGATTGAAGGGGAG   | <i>African mahogany</i>      | (KARAN,2012)                |
| 96  | JF423315 | AAGCATCAGCAGAAGCACC     | TGGGATGTAACCGAGGTGTG     | <i>African mahogany</i>      | (KARAN,2012)                |
| 97  | AJ000402 | GAGATACAGTTGGTGGTTAGAGG | TCTTCACCTGTTTGCCTCTC     | <i>Swietenia humilis</i>     | (White and<br>Powell,1997b) |
| 98  | AJ000411 | TCATTTGGAATCTGGGTTCT    | TTATTTTCGTACCCTTCGCTC    | <i>Swietenia humilis</i>     | (White and<br>Powell,1997b) |
| 99  | AJ000403 | ATAAGCCAGATGACGGAACG    | GCATACGGCTTTCTGGATGT     | <i>Swietenia humilis</i>     | (White and<br>Powell,1997b) |
| 100 | FM161910 | GCATCAGTCAGCCATAGTGC    | TTGAAAAATCCTGGCGAGTG     | <i>Azadirachta indica</i>    | (Boontong,2009)             |
| 101 | AF428116 | TCTGCTACAGAGCTGGATGC    | GTATGCTCGAAGAAGTCGTTG    | <i>Swietenia macrophylla</i> | (Lemes,2002)                |
| 102 | AF428117 | CTTCTAATGTTCTGATGCCTG   | AGCAACTCGTGAGGAATTTAC    | <i>Swietenia macrophylla</i> | (Lemes,2002)                |
| 103 | AF428118 | CACCTTATGTACACCACACAG   | GAAGGAGACACCAGCAATC      | <i>Swietenia macrophylla</i> | (Lemes,2002)                |
| 104 | AF428119 | GCACTCAAGGTACACTATGAT   | TACGTGTGAATGCGTCTAT      | <i>Swietenia macrophylla</i> | (Lemes,2002)                |
| 105 | AF428120 | TGCTACTGTCAAGAGTGTAT    | GACAAACATGTACCACAAG      | <i>Swietenia macrophylla</i> | (Lemes,2002)                |
| 106 | AF428121 | CCTTATGTTCAACCACACAGTA  | GAGACACCAGCAATCCAG       | <i>Swietenia macrophylla</i> | (Lemes,2002)                |
| 107 | AF428122 | GCAGTACTCGCCTATCTTCA    | TGAGAACTGCAGAATCCTTT     | <i>Swietenia macrophylla</i> | (Lemes,2002)                |
| 108 | AF428123 | GCCATTGGTCTCAATCTTAC    | GGAAGAGTCTTAGAACACAG     | <i>Swietenia macrophylla</i> | (Lemes,2002)                |
| 109 | AF428124 | GCAATTTCCAGAAGAAACC     | CTGTAGGCGATAACAATCAG     | <i>Swietenia macrophylla</i> | (Lemes,2002)                |
| 110 | AB674472 | TGTCTATCCGGTGAAGGTGT    | TTGCATACAATAATATCGTGCAAC | <i>Melia volkensii</i>       | (Hanaoka,2012)              |
| 111 | AB674473 | CCCTATTCAATTGTCCCTCCA   | GTCCTCCTGGAATTCTGTGC     | <i>Melia volkensii</i>       | (Hanaoka,2012)              |
| 112 | AB674474 | AGAGAAGACAGATCCCCCAGT   | CAACACAACACAACACAGCAA    | <i>Melia volkensii</i>       | (Hanaoka,2012)              |
| 113 | AB674475 | CAACCATGGTGTGCGAGAAGA   | TGCTTAATTTGCCTGTGCAT     | <i>Melia volkensii</i>       | (Hanaoka,2012)              |
| 114 | AB674476 | CTAGACCAGCCCCAAGAACA    | TTCAAGGGCTTCTTCTGAATC    | <i>Melia volkensii</i>       | (Hanaoka,2012)              |

Table S2. to be continued

|     |          |                            |                        |                        |                |
|-----|----------|----------------------------|------------------------|------------------------|----------------|
| 115 | AB674477 | CCAATGTTGTTCAACTATATGAGGTC | GAATTTCTGAAGAGTGCCAAAA | <i>Melia volkensii</i> | (Hanaoka,2012) |
| 116 | AB674478 | GGAACCCCAATTTAGGAACT       | TGCTTGGTGAAAACCATAGA   | <i>Melia volkensii</i> | (Hanaoka,2012) |
| 117 | AB674479 | CCGTGTAAGAGTGCCAAATC       | TCTTGGAGGTGAGATCAAGTG  | <i>Melia volkensii</i> | (Hanaoka,2012) |
| 118 | AB674480 | TCTGTTGGTGGTGTGTGTCAC      | TAATGTGGATGCAAGCAGTG   | <i>Melia volkensii</i> | (Hanaoka,2012) |
| 119 | AB674481 | CAAGCACACACAAGGATTG        | TGGCAACTCTCAGGTATCAA   | <i>Melia volkensii</i> | (Hanaoka,2012) |
| 120 | AB674482 | GTTGTTTGTGGGTGTGTGTT       | GAGAGAGAACCCAAAGGAAAA  | <i>Melia volkensii</i> | (Hanaoka,2012) |
| 121 | AB674483 | CCTTGTCGTGTAAAGTGTGCG      | TACTCATTTGGGGGTGCTA    | <i>Melia volkensii</i> | (Hanaoka,2012) |
| 122 | AB674484 | GTGCAGTGTCCATGTTGAAG       | GACATTTTCTCTGCAAGGTCA  | <i>Melia volkensii</i> | (Hanaoka,2012) |
| 123 | AB674485 | TTCCCTCAGCATTAAGGTGT       | CAGGCAAAGGAAGGTAGGTA   | <i>Melia volkensii</i> | (Hanaoka,2012) |
| 124 | AB674486 | ACTTTGTCGCCATATCGAAG       | CTCCACTCACTTCTCGGTGT   | <i>Melia volkensii</i> | (Hanaoka,2012) |
| 125 | BV725398 | TTGCTTACGCGTGGATATTG       | CAGCACCTTGTTTCGCATTA   | <i>Guarea guidonia</i> | (de Lima,2009) |
| 126 | BV725397 | TGAAATTTGCGCTCTTGCTT       | ATTCTTTTGCTTACGCGTGG   | <i>Guarea guidonia</i> | (de Lima,2009) |
| 127 | BV725399 | TAGGCAGTTGGAAGGCTTA        | GATCCGGAACCTACCTGCAA   | <i>Guarea guidonia</i> | (de Lima,2009) |
| 128 | BV725400 | TTTTATGGATGCGTAAAGGATG     | TTGGTTATGTGGCGATTTTG   | <i>Guarea guidonia</i> | (de Lima,2009) |
| 129 | BV725401 | TCTTGCTTACGCGTGGACTA       | TACGCGTGGACTAACAGACG   | <i>Guarea guidonia</i> | (de Lima,2009) |
| 130 | BV725392 | AGCCTTGTCGCCAAACTAA        | ATCACACCTATGTGGGCTGC   | <i>Guarea guidonia</i> | (de Lima,2009) |
| 131 | BV725393 | ATTCTCTTGCTTACGCGTGG       | CCGGAACCTAACCTGCAAAAC  | <i>Guarea guidonia</i> | (de Lima,2009) |
| 132 | BV725394 | GCGGATATGATTCGAGAGGT       | TCTTGCTTACGCGTGGACTA   | <i>Guarea guidonia</i> | (de Lima,2009) |
| 133 | BV725395 | CATATGGCAAGGTGCTGATG       | AAATGTGGTTGCGTGTGTGT   | <i>Guarea guidonia</i> | (de Lima,2009) |
| 134 | BV725396 | ATTCTCTTGCTTACGCGTGG       | GAGGAGCCTGATCACCAGAA   | <i>Guarea guidonia</i> | (de Lima,2009) |
| 135 | BV725402 | TCTTGCTTACGCGTGGACTA       | GTGGAGGAGCCTGGTCACTA   | <i>Guarea guidonia</i> | (de Lima,2009) |
