# Supplementary material for: Climate-Driven Adaptive Differentiation in Melia azedarach: Evidence from a Common Garden Experiment
Source: MDPI journal article supplement (doi:10.3390/genes13111924), 2022-10-22
Supplement: s1 [file s1]

Table S1. The information of 15 pair primers for SSR analysis

| Locus code | Primer sequence (5'-3')                             | T <sub>m</sub> (°C) | Repeat motif      | Expected allele size range(bp) | Number of alleles | Genbank accession no. |
|------------|-----------------------------------------------------|---------------------|-------------------|--------------------------------|-------------------|-----------------------|
| SSR2       | F: GATAGCGGAGCCGGTGATT<br>R: GGATGGAAGGCTCAAGATTCG  | 60                  | (AG)12<br>TT(AG)7 | 242-284                        | 21                | HM041034              |
| SSR29      | F: ATGGATGAGTGTGCGATAGG<br>R: TGTGATGTAGGAGTCTGAAC  | 60                  | (TC)7             | 168-184                        | 9                 | DQ453912              |
| SSR54      | F: GAGAAGAGAAGGCTGTGTGC<br>R: GAAACCTGATTCGTCGTCGT  | 62                  | (CT)47            | 146-170                        | 14                | GQ254833              |
| SSR59      | F: CTCCTCGTTTGCCACTCATT<br>R: AAACAGAGGGTTTTCGGTGC  | 56                  | (CT)20            | 196-330                        | 25                | GQ254847              |
| SSR74      | F: GTCCACGCAAACAGAGACAC<br>R: TTGGCTTGGCTTTCTCTTTC  | 58                  | (CT)10            | 204-240                        | 14                | FM161912              |
| SSR111     | F: CCCTATTCATTGTCCCTCCA<br>R: GTCCTCCTGGAATTCTGTGC  | 60                  | (CT)19            | 126-164                        | 20                | AB674473              |
| SSR113     | F: CAACCATGGTGTGCGAGAAGA<br>R: TGCTTAATTTGCCTGTGCAT | 60                  | (AG)23            | 168-192                        | 11                | AB674475              |
| SSR114     | F:CTAGACCAGCCCCAAGAACA<br>R: TTCAAGGGCTTCTTCTGAATC  | 60                  | (AC)9             | 204-232                        | 15                | AB674476              |
| SSR116     | F: GGAACCCCAATTTAGGAACT<br>R: TGCTTGGTGAAAACCATAGA  | 58                  | (AC)11            | 180-214                        | 18                | AB674478              |
| SSR117     | F: CCGTGTAAGAGTGCCAAATC<br>R: TCTTGAGGTGAGATCAAGTG  | 60                  | (TA)5(TG)17       | 86-188                         | 10                | AB674479              |
| SSR118     | F:TCTGTTGGTGGTGTGTCAC<br>R:TAATGTGGATGCAAGCAGTG     | 58                  | (TC)22(AC)10      | 148-182                        | 18                | AB674480              |
| SSR119     | F: CAAGCACACACAAGGATTTG<br>R: TGGCAACTCTCAGGTATCAA  | 52                  | (GA)21            | 200-236                        | 18                | AB674481              |
| SSR120     | F: GTTGTTTGTGGGTGTGTGTT<br>R: GAGAGAGAACCCAAAGGAAAA | 60                  | (TC)7(AC)12       | 260-312                        | 27                | AB674482              |
| SSR122     | F: GTGCAGTGTCCATGTTGAAG<br>R: GACATTTTCTCTGCAAGGTCA | 60                  | (TG)14            | 158-260                        | 32                | AB674484              |
| SSR123     | F: TTCCCTCAGCATTAAGGTGT<br>R: CAGGCAAAGGAAGGTAGGTA  | 60                  | (TA)9(TG)8        | 84-112                         | 8                 | AB674485              |
