# Supplementary material for: Climate-Driven Adaptive Differentiation in Melia azedarach: Evidence from a Common Garden Experiment
Source: MDPI journal article supplement (doi:10.3390/genes13111924), 2022-10-22
Supplement: s1 [file s1]

Table S3. Tests of Hardy-Weinberg equilibrium at each SSR locus in each population.

| population | SSR02  | SSR29  | SSR54  | SSR59  | SSR74  | SSR111 | SSR113 | SSR114 | SSR116 | SSR117 | SSR118 | SSR119 | SSR120 | SSR122 | SSR123 |
|------------|--------|--------|--------|--------|--------|--------|--------|--------|--------|--------|--------|--------|--------|--------|--------|
| 412        | 0.0175 | 0.0255 | 0.1715 | 0.2278 | 0.0138 | 0.0128 | 0.0009 | 0.0007 | 0.6967 | 0.3675 | 0.0066 | 0.0000 | 0.9856 | 0.0000 | 0.0390 |
|            | 0.0055 | –      | 0.0147 | 0.0286 | 0.0036 | 0.0045 | 0.0004 | 0.0006 | 0.0207 | 0.0084 | 0.0022 | 0.0000 | 0.0057 | 0.0000 | 0.0053 |
| 741        | 0.0000 | 0.0188 | 0.5966 | 0.1177 | 0.0490 | 0.1590 | 0.0236 | 0.0057 | 0.0936 | 0.2941 | 0.0000 | 0.0036 | 0.0000 | 0.0346 | 0.6654 |
|            | 0.0000 | –      | 0.0179 | 0.0092 | 0.0064 | 0.0167 | 0.0033 | 0.0009 | 0.0105 | –      | 0.0000 | 0.0036 | 0.0000 | 0.0077 | 0.0076 |
| 631        | 0.0011 | 0.0015 | 0.0381 | 0.3549 | 0.0549 | 0.0015 | 0.0004 | 0.0598 | 0.0499 | 0.0009 | 0.0037 | 0.0000 | 0.0000 | 0.0072 | 0.1038 |
|            | 0.0010 | –      | 0.0046 | 0.0188 | 0.0062 | 0.0007 | –      | 0.0044 | 0.0044 | –      | 0.0014 | 0.0000 | 0.0000 | 0.0043 | –      |
| 739        | 0.0014 | 0.1336 | 0.0003 | 0.0147 | 0.0064 | 0.0145 | 0.0012 | 0.8614 | 0.0045 | 0.0000 | 0.0000 | 0.0000 | 0.0000 | 0.0000 | 0.1532 |
|            | 0.0010 | 0.0049 | 0.0003 | 0.0042 | 0.0018 | 0.0036 | –      | 0.0217 | 0.0015 | 0.0000 | 0.0000 | 0.0000 | 0.0000 | 0.0000 | –      |
| 205        | 0.0019 | 0.0019 | 0.0383 | 0.1095 | 0.0020 | 0.9894 | 0.0000 | 0.0193 | 0.2185 | 0.0817 | 0.0292 | 0.0000 | 0.0666 | 0.0017 | 0.5650 |
|            | 0.0013 | –      | 0.0041 | 0.0145 | –      | 0.0029 | 0.0000 | 0.0052 | 0.0106 | 0.0056 | 0.0058 | 0.0000 | 0.0130 | 0.0006 | 0.0085 |
| 524        | 0.0000 | 0.0026 | 0.0012 | 0.0111 | 0.2966 | 0.3994 | 0.0012 | 0.0002 | 0.0013 | 0.0009 | 0.0000 | 0.0000 | 0.0000 | 0.0000 | 0.2121 |
|            | 0.0000 | 0.0010 | 0.0006 | 0.0038 | 0.0141 | 0.0315 | –      | 0.0002 | –      | –      | 0.0000 | 0.0000 | 0.0000 | 0.0000 | 0.0076 |
| 525        | 0.0201 | 0.0000 | 0.0005 | 0.4280 | 0.0015 | 0.0000 | 0.0010 | 0.0000 | 0.0008 | 0.0013 | 0.0017 | 0.0055 | 0.0000 | 0.0000 | 0.8018 |
|            | –      | –      | 0.0003 | 0.0291 | –      | 0.0000 | –      | 0.0000 | –      | –      | 0.0012 | 0.0041 | 0.0000 | –      | 0.0058 |
| 628        | 0.0034 | 0.0020 | 0.7983 | 0.0000 | 0.0005 | 0.1318 | 0.0000 | 0.0034 | 0.1072 | 0.0643 | 0.0019 | 0.0000 | 0.1214 | 0.0000 | 0.0610 |
|            | 0.0012 | –      | 0.0133 | 0.0000 | 0.0004 | 0.0156 | 0.0000 | –      | 0.0168 | 0.0040 | 0.0015 | 0.0000 | 0.0155 | 0.0000 | 0.0082 |
| 415        | 0.0008 | 0.0008 | 0.1531 | 0.4042 | 0.0012 | 0.0006 | 0.0000 | 0.0016 | 0.0109 | 0.0023 | 0.0004 | 0.0005 | 0.0000 | 0.0000 | 0.0964 |
|            | 0.0008 | –      | 0.0143 | 0.0158 | –      | 0.0004 | 0.0000 | –      | 0.0054 | 0.0009 | 0.0004 | 0.0004 | 0.0000 | 0.0000 | 0.0056 |
| 307        | 0.0014 | 0.0020 | 0.2731 | 0.1964 | 0.0010 | 0.0139 | 0.0178 | 0.0005 | 0.2327 | 0.6960 | 0.0864 | 0.0000 | 0.0000 | 0.0125 | 0.0878 |
|            | 0.0014 | –      | 0.0237 | 0.0175 | –      | 0.0031 | 0.0023 | –      | 0.0097 | 0.0109 | 0.0161 | 0.0000 | 0.0000 | 0.0065 | 0.0040 |
| 842        | 0.0000 | 0.1304 | 0.0006 | 0.0002 | 0.0024 | 0.1369 | 0.0000 | 0.0010 | 0.0017 | 0.0100 | 0.0005 | 0.0000 | 0.0000 | 0.0000 | 0.0002 |
|            | 0.0000 | 0.0151 | 0.0005 | 0.0001 | –      | 0.0108 | –      | 0.0009 | –      | 0.0034 | –      | 0.0000 | 0.0000 | 0.0000 | –      |
| 308        | 0.0127 | 0.0278 | 0.1556 | 0.2030 | 0.2117 | 0.5165 | 0.0000 | 0.0017 | 0.0738 | 0.0024 | 0.0000 | 0.0000 | 0.5910 | 0.0000 | 0.4162 |
|            | 0.0033 | 0.0030 | 0.0116 | 0.0414 | 0.0147 | 0.0300 | 0.0000 | 0.0012 | 0.0071 | 0.0006 | 0.0000 | 0.0000 | 0.0447 | 0.0000 | 0.0069 |

Table S3 to be continued

|      |        |        |        |        |        |        |        |        |        |        |        |        |        |        |        |
|------|--------|--------|--------|--------|--------|--------|--------|--------|--------|--------|--------|--------|--------|--------|--------|
| 310  | 0.0041 | 0.0218 | 0.8047 | 0.0581 | 0.0015 | 0.7327 | 0.0041 | 0.1003 | 0.4607 | 0.1775 | 0.0006 | 0.0000 | 0.0000 | 0.0000 | 0.0098 |
|      | 0.0021 | 0.0030 | 0.0146 | 0.0105 | 0.0009 | 0.0259 | 0.0014 | 0.0090 | 0.0215 | 0.0109 | 0.0006 | 0.0000 | 0.0000 | 0.0000 | 0.0026 |
| 843  | 0.0006 | 0.0065 | 0.2671 | 0.6800 | 0.0032 | 0.4485 | 0.0001 | 0.0000 | 0.6065 | 0.0126 | 0.0005 | 0.1265 | 0.0023 | 0.0000 | 0.0542 |
|      | 0.0004 | 0.0015 | 0.0145 | 0.0382 | 0.0009 | 0.0427 | –      | 0.0000 | 0.0342 | 0.0023 | 0.0003 | 0.0221 | 0.0016 | 0.0000 | 0.0032 |
| 102  | 0.0000 | 0.0009 | 0.0593 | 0.0082 | 0.0032 | 0.0327 | 0.0005 | 0.0000 | 0.0789 | 0.0125 | 0.0000 | 0.0000 | 0.0000 | 0.0000 | 0.1457 |
|      | 0.0000 | –      | 0.0136 | 0.0014 | –      | 0.0067 | –      | 0.0000 | 0.0160 | 0.0028 | 0.0000 | 0.0000 | 0.0000 | 0.0000 | 0.0105 |
| 844  | 0.0067 | 0.0154 | 0.2220 | 0.2343 | 0.0073 | 0.7128 | 0.0003 | 0.0080 | 0.0141 | 0.0706 | 0.0018 | 0.0000 | 0.0004 | 0.0000 | 0.0323 |
|      | 0.0033 | –      | 0.0104 | 0.0253 | 0.0018 | 0.0156 | –      | 0.0036 | 0.0026 | 0.0049 | 0.0009 | 0.0000 | 0.0004 | 0.0000 | 0.0025 |
| 1061 | 0.0000 | 0.0138 | 0.2520 | 0.0026 | 0.0004 | 0.5005 | 0.0007 | 0.0024 | 0.0439 | 0.0049 | 0.0829 | 0.0000 | 0.2527 | 0.0000 | 0.0014 |
|      | 0.0000 | 0.0027 | 0.0124 | 0.0008 | –      | 0.0143 | 0.0004 | 0.0012 | 0.0144 | 0.0021 | 0.0123 | 0.0000 | 0.0251 | 0.0000 | 0.0005 |
| 1767 | 0.0049 | 0.0001 | 0.0282 | 0.0446 | 0.0163 | 0.4580 | 0.0189 | 0.0031 | 0.0147 | 0.0006 | 0.0008 | 0.0000 | 0.0023 | 0.0000 | 0.6935 |
|      | 0.0026 | 0.0001 | 0.0038 | 0.0057 | –      | 0.0275 | –      | –      | 0.0018 | 0.0005 | 0.0006 | 0.0000 | 0.0014 | 0.0000 | 0.0100 |
| 754  | 0.0158 | 0.0150 | 0.0009 | 0.0000 | 0.0083 | 0.0407 | 0.0000 | 0.3577 | 0.0046 | 0.0486 | 0.0012 | 0.0000 | 0.1079 | 0.0000 | 0.1000 |
|      | 0.0026 | 0.0017 | –      | 0.0000 | 0.0012 | 0.0036 | 0.0000 | 0.0145 | 0.0013 | 0.0044 | 0.0012 | 0.0000 | 0.0190 | 0.0000 | –      |
| 959  | 0.0892 | 0.0040 | 0.0000 | 0.0000 | 0.0569 | 0.0138 | 0.0000 | 0.0000 | 0.0001 | 0.0000 | 0.0001 | 0.0000 | 0.0000 | 0.0000 | 0.0003 |
|      | 0.0116 | –      | 0.0000 | 0.0000 | 0.0038 | 0.0021 | 0.0000 | 0.0000 | 0.0001 | 0.0000 | 0.0001 | 0.0000 | 0.0000 | 0.0000 | –      |
| 1565 | 0.0136 | 0.0057 | 0.1847 | 0.0011 | 0.0345 | 0.0672 | 0.0006 | 0.0038 | 0.0011 | 0.0137 | 0.0051 | 0.0012 | 0.0000 | 0.0000 | 0.1214 |
|      | 0.0021 | 0.0011 | 0.0096 | 0.0007 | 0.0038 | 0.0130 | –      | 0.0028 | 0.0009 | 0.0027 | 0.0023 | 0.0012 | 0.0000 | 0.0000 | 0.0067 |
| 1666 | 0.3607 | 0.0005 | 0.0000 | 0.6143 | 0.1786 | 0.0076 | 0.0171 | 0.3675 | 0.0185 | 0.0987 | 0.0001 | 0.0000 | 0.0658 | 0.0000 | 0.8644 |
|      | 0.0232 | –      | 0.0000 | 0.0119 | 0.0067 | 0.0029 | 0.0023 | 0.0148 | 0.0036 | 0.0092 | 0.0001 | 0.0000 | 0.0112 | 0.0000 | 0.0060 |
| 1768 | 0.0093 | 0.0009 | 0.2678 | 0.0293 | 0.0143 | 0.7320 | 0.0198 | 0.0000 | 0.0912 | 0.0172 | 0.0000 | 0.0000 | 0.0000 | 0.0002 | 0.2415 |
|      | 0.0036 | –      | 0.0173 | 0.0060 | 0.0024 | 0.0128 | 0.0037 | 0.0000 | 0.0080 | 0.0037 | 0.0000 | 0.0000 | 0.0000 | 0.0002 | 0.0108 |
| 1464 | 0.0087 | 0.0009 | 0.0455 | 0.0133 | 0.4563 | 0.0731 | 0.0112 | 0.1357 | 0.2643 | 0.0314 | 0.0001 | 0.0000 | 0.0000 | 0.0000 | 0.0081 |
|      | 0.0022 | –      | 0.0076 | 0.0021 | 0.0071 | 0.0054 | 0.0018 | 0.0142 | 0.0084 | 0.0029 | 0.0001 | 0.0000 | 0.0000 | 0.0000 | 0.0053 |

Table S3 to be continued

|      |        |        |        |        |        |        |        |        |        |        |        |        |        |        |        |
|------|--------|--------|--------|--------|--------|--------|--------|--------|--------|--------|--------|--------|--------|--------|--------|
| 1363 | 0.0925 | 0.0009 | 0.0007 | 0.3446 | 0.0019 | 0.5500 | 0.0000 | 0.0765 | 0.0001 | 0.0034 | 0.0002 | 0.0000 | 0.0096 | 0.0000 | 0.0045 |
|      | 0.0116 | –      | 0.0005 | 0.0181 | –      | 0.0244 | 0.0000 | 0.0088 | 0.0001 | 0.0011 | 0.0002 | 0.0000 | 0.0033 | 0.0000 | –      |
| 652  | 0.0000 | 0.0021 | 0.0413 | 0.3722 | 0.0000 | 0.5711 | 0.0010 | 0.0000 | 0.0180 | 0.0054 | 0.0087 | 0.0034 | 0.0000 | 0.0020 | 0.1674 |
|      | 0.0000 | 0.0007 | 0.0082 | 0.0203 | 0.0000 | 0.0238 | 0.0005 | 0.0000 | 0.0053 | 0.0022 | 0.0024 | 0.0021 | 0.0000 | 0.0010 | 0.0109 |
| 1869 | 0.3855 | 0.0028 | 0.2485 | 0.0284 | 0.1221 | 0.0198 | 0.0000 | 0.0000 | 0.0038 | 0.0141 | 0.0000 | 0.0000 | 0.0205 | 0.0000 | 0.2633 |
|      | 0.0344 | –      | 0.0148 | 0.0025 | 0.0076 | 0.0046 | 0.0000 | 0.0000 | 0.0009 | –      | 0.0000 | 0.0000 | 0.0086 | 0.0000 | 0.0181 |
| 1060 | 0.0339 | 0.0647 | 0.0142 | 0.0000 | 0.0003 | 0.0031 | 0.0000 | 0.0000 | 0.0028 | 0.0047 | 0.0000 | 0.0000 | 0.0258 | 0.0000 | 0.0056 |
|      | 0.0111 | 0.0083 | 0.0021 | 0.0000 | –      | 0.0017 | 0.0000 | 0.0000 | 0.0009 | –      | 0.0000 | 0.0000 | 0.0079 | 0.0000 | –      |
| 1162 | 0.1038 | 0.0211 | 0.2149 | 0.1180 | 0.0338 | 0.0078 | 0.0387 | 0.0015 | 0.0000 | 0.0079 | 0.0000 | 0.0165 | 0.0887 | 0.0000 | 0.0542 |
|      | 0.0174 | 0.0030 | 0.0227 | 0.0162 | 0.0048 | 0.0025 | 0.0093 | 0.0009 | 0.0000 | 0.0023 | 0.0000 | 0.0057 | 0.0104 | 0.0000 | 0.0031 |
| 858  | 0.0615 | 0.0754 | 0.0177 | 0.0000 | 0.0045 | 0.3664 | 0.0000 | 0.0020 | 0.0031 | 0.0003 | 0.0000 | 0.0000 | 0.0000 | 0.0000 | 0.1783 |
|      | 0.0131 | 0.0046 | 0.0038 | –      | –      | 0.0167 | 0.0000 | 0.0009 | 0.0010 | –      | 0.0000 | 0.0000 | 0.0000 | 0.0000 | 0.0134 |
| 248  | 0.0882 | 0.0041 | 0.0431 | 0.0018 | 0.2417 | 0.0000 | 0.0000 | 0.0006 | 0.0180 | 0.0016 | 0.0000 | 0.0000 | 0.0000 | 0.0000 | 0.0443 |
|      | 0.0117 | 0.0013 | 0.0110 | 0.0007 | 0.0092 | 0.0000 | 0.0000 | 0.0006 | 0.0038 | –      | 0.0000 | 0.0000 | 0.0000 | 0.0000 | 0.0038 |
